# Supplementary material for: The Usefulness of a Massive Open Online Course about Postural and Technological Adaptations to Enhance Academic Performance and Empathy in Health Sciences Undergraduates
Source: Int J Environ Res Public Health. 2021 Oct 12;18(20):10672. doi: 10.3390/ijerph182010672 (PMC8536090; doi:10.3390/ijerph182010672)
Supplement: Supplementary file 1 [file ijerph-18-10672-s001.zip › ijerph-1387545-supplementary.pdf]

Table S1: Description of Assessing a Massive Online Course Rubric.

| Category                                                                      | Needs<br>improvement<br>(0) | Basic<br>(1) | Good<br>(2) | Excellent<br>(3) | SCORE |
|-------------------------------------------------------------------------------|-----------------------------|--------------|-------------|------------------|-------|
| 1. Knowledge about disability                                                 |                             |              |             |                  |       |
| 2. Identifying the differences between different pathological posture schemes |                             |              |             |                  |       |
| 3. To know what a support product is                                          |                             |              |             |                  |       |
| 4. Make a postural adaptation                                                 |                             |              |             |                  |       |
| 5. Concept of Virtual Reality                                                 |                             |              |             |                  |       |
| 6. Philosophy of low-cost                                                     |                             |              |             |                  |       |
| 7. Technological devices of low-cost postural intervention                    |                             |              |             |                  |       |
| 8. The importance of adapted games                                            |                             |              |             |                  |       |
| 9. Assessment critical thinking                                               |                             |              |             |                  |       |
| 10. Organization                                                              |                             |              |             |                  |       |
| 11. Professor provides Feedback/<br>Encouragement on Discussion Boards        |                             |              |             |                  |       |
| <b>TOTAL SCORE</b>                                                            |                             |              |             |                  |       |
